# Supplementary material for: Evaluation of DNA extraction methods for clinical Mycobacterium tuberculosis primary liquid culture for whole-genome sequencing
Source: Research Square preprint supplement (doi:10.21203/rs.3.rs-7905849/v1), 2025-11-18
Supplement: Supplementary file 3 [file cpc_kits_suppl_fig_4.docx]

**Supplementary Figure 3.** Samples are categorised based on the total double-strand (ds) DNA quantity (measured in ng) for each DNA extraction method. Each dot on the plot corresponds to a specific sample and is labelled with its identification. Among these dots, the three samples highlighted in green that fell at the midpoint were chosen for the whole-genome sequencing (WGS) approach.
