# Supplementary material for: Evaluation of DNA extraction methods for clinical Mycobacterium tuberculosis primary liquid culture for whole-genome sequencing
Source: Research Square preprint supplement (doi:10.21203/rs.3.rs-7905849/v1), 2025-11-18
Supplement: Supplementary file 4 [file cpc_kits_suppl_table_1.xlsx]

## Sheet: Supplementary Table 1
Supplementary Table 1. DNA Extraction quality control based on DNA quantity (Qubit) and purity (Nanodrop) for each method.
DNA Extraction Method	Sample ID	Volume DNA (µL)	Qubit dsDNA HS concentration (ng/µL)	Total dsDNA	Nanodrop Nuleic Acid concentration (ng/µL)	Nanodrop (280/260). Quantification of protein light absorbance against the expect DNA light absorbance	Nanodrop (280/230). Quantification of salt light absorbance against the expect DNA light absorbance
CTAB Reduced Volume	1A	25	6.73	168.25	38.4	1.92	0.94
CTAB Reduced Volume	1B	25	13.1	327.5	52.4	2.01	1.31
CTAB Reduced Volume	1C	25	9.74	243.5	57.4	1.97	1.22
CTAB Reduced Volume	1D	25	13.8	345	45.9	1.96	1.22
CTAB Reduced Volume	1E	25	13.8	345	52	2	1.71
CTAB Reduced Volume	1F	25	10.4	260	45.4	2.02	1.46
CTAB Reduced Volume	1G	25	12.5	312.5	65.9	1.96	1.3
CTAB Reduced Volume	1H	25	11.3	282.5	41.1	1.98	1.14
CTAB Reduced Volume	1I	25	15.1	377.5	54.1	1.98	1.35
CTAB Reduced Volume	1J	25	10.3	257.5	42.4	1.87	0.85
CTAB Reduced Volume + RNase	2A	25	16.2	405	63.8	2	1.42
CTAB Reduced Volume + RNase	2B	25	15.1	377.5	50.2	2.04	1.7
CTAB Reduced Volume + RNase	2C	25	15.5	387.5	54.9	1.96	1.22
CTAB Reduced Volume + RNase	2D	25	15.9	397.5	41.9	1.97	1.23
CTAB Reduced Volume + RNase	2E	25	17.7	442.5	57.3	2	1.46
CTAB Reduced Volume + RNase	2F	25	15.5	387.5	53.2	2.02	1.58
CTAB Reduced Volume + RNase	2G	25	14.4	360	45.8	2.01	1.99
CTAB Reduced Volume + RNase	2H	25	17.8	445	57.4	2.05	1.43
CTAB Reduced Volume + RNase	2I	25	9.81	245.25	34.2	1.97	4.09
CTAB Reduced Volume + RNase	2J	25	10.6	265	40.7	1.98	1.18
Zymo Clean and Concentrate™-25 kit (Zymo Research, Irvine, USA)	3A	50	0.259	12.95	1.6	2.28	0.32
Zymo Clean and Concentrate™-25 kit (Zymo Research, Irvine, USA)	3B	50	0.304	15.2	1.4	35.54	0.47
Zymo Clean and Concentrate™-25 kit (Zymo Research, Irvine, USA)	3C	50	1.07	53.5	2.4	4.53	0.43
Zymo Clean and Concentrate™-25 kit (Zymo Research, Irvine, USA)	3D	50	1.34	67	3.4	3.29	1.06
Zymo Clean and Concentrate™-25 kit (Zymo Research, Irvine, USA)	3E	50	0.961	48.05	1.8	2.15	0.64
Zymo Clean and Concentrate™-25 kit (Zymo Research, Irvine, USA)	3F	50	1.6	80	2.5	4.31	0.9
Zymo Clean and Concentrate™-25 kit (Zymo Research, Irvine, USA)	3G	50	0.949	47.45	2.7	2.31	0.71
Zymo Clean and Concentrate™-25 kit (Zymo Research, Irvine, USA)	3H	50	1.04	52	2.8	2.36	0.5
Zymo Clean and Concentrate™-25 kit (Zymo Research, Irvine, USA)	3I	50	0.949	47.45	2	10.41	0.62
Zymo Clean and Concentrate™-25 kit (Zymo Research, Irvine, USA)	3J	50	0.861	43.05	2.4	2.71	0.92
Zymo Quick-DNA Fungal/Bacterial Miniprep kit (Zymo Research, Irvine, USA)	4A	50	"Too low" (Undetected)	0	7.9	1.55	0.02
Zymo Quick-DNA Fungal/Bacterial Miniprep kit (Zymo Research, Irvine, USA)	4B	50	"Too low" (Undetected)	0	4.7	1.12	0.02
Zymo Quick-DNA Fungal/Bacterial Miniprep kit (Zymo Research, Irvine, USA)	4C	50	"Too low" (Undetected)	0	2.1	6.27	0.01
Zymo Quick-DNA Fungal/Bacterial Miniprep kit (Zymo Research, Irvine, USA)	4D	50	"Too low" (Undetected)	0	2.1	1.42	0.01
Zymo Quick-DNA Fungal/Bacterial Miniprep kit (Zymo Research, Irvine, USA)	4E	50	"Too low" (Undetected)	0	1.2	7.03	0.02
Zymo Quick-DNA Fungal/Bacterial Miniprep kit (Zymo Research, Irvine, USA)	4F	50	"Too low" (Undetected)	0	1.7	3.29	0.01
Zymo Quick-DNA Fungal/Bacterial Miniprep kit (Zymo Research, Irvine, USA)	4G	50	"Too low" (Undetected)	0	1.2	8.66	0.02
Zymo Quick-DNA Fungal/Bacterial Miniprep kit (Zymo Research, Irvine, USA)	4H	50	"Too low" (Undetected)	0	0.7	2.73	0.02
Zymo Quick-DNA Fungal/Bacterial Miniprep kit (Zymo Research, Irvine, USA)	4I	50	"Too low" (Undetected)	0	1	10.23	0.04
Zymo Quick-DNA Fungal/Bacterial Miniprep kit (Zymo Research, Irvine, USA)	4J	50	"Too low" (Undetected)	0	2.8	2.16	3
InstaGene Matrix (Bio-rad laboratories, Hercules, USA)	5A	150	"Too low" (Undetected)	0	11.8	1.67	0.64
InstaGene Matrix (Bio-rad laboratories, Hercules, USA)	5B	150	"Too low" (Undetected)	0	16	1.54	0.64
InstaGene Matrix (Bio-rad laboratories, Hercules, USA)	5C	150	0.071	10.65	16.3	1.51	0.47
InstaGene Matrix (Bio-rad laboratories, Hercules, USA)	5D	150	"Too low" (Undetected)	0	13.9	1.52	0.56
InstaGene Matrix (Bio-rad laboratories, Hercules, USA)	5E	150	0.075	11.25	14.4	1.52	0.58
InstaGene Matrix (Bio-rad laboratories, Hercules, USA)	5F	150	0.203	30.45	14.7	1.46	0.56
InstaGene Matrix (Bio-rad laboratories, Hercules, USA)	5G	150	0.121	18.15	20.3	1.46	0.59
InstaGene Matrix (Bio-rad laboratories, Hercules, USA)	5H	150	0.103	15.45	17.2	1.46	0.55
InstaGene Matrix (Bio-rad laboratories, Hercules, USA)	5I	150	0.07	10.5	14	1.54	0.6
InstaGene Matrix (Bio-rad laboratories, Hercules, USA)	5J	150	0.082	12.3	15.9	1.48	0.51
InstaGene Matrix (Bio-rad laboratories, Hercules, USA) + High-speed homogeneizer	6A	150	7.53	1129.5	1141.7	1.45	1.32
InstaGene Matrix (Bio-rad laboratories, Hercules, USA) + High-speed homogeneizer	6B	150	3.59	538.5	1123.5	1.44	1.32
InstaGene Matrix (Bio-rad laboratories, Hercules, USA) + High-speed homogeneizer	6C	150	4.35	652.5	1130.9	1.45	1.31
InstaGene Matrix (Bio-rad laboratories, Hercules, USA) + High-speed homogeneizer	6D	150	1.63	244.5	1092	1.43	1.35
InstaGene Matrix (Bio-rad laboratories, Hercules, USA) + High-speed homogeneizer	6E	150	4.47	670.5	1134.6	1.45	1.31
InstaGene Matrix (Bio-rad laboratories, Hercules, USA) + High-speed homogeneizer	6F	150	4.46	669	1126.6	1.44	1.32
InstaGene Matrix (Bio-rad laboratories, Hercules, USA) + High-speed homogeneizer	6G	150	4.9	735	1121.5	1.44	1.32
InstaGene Matrix (Bio-rad laboratories, Hercules, USA) + High-speed homogeneizer	6H	150	4.93	739.5	1125.4	1.44	1.32
InstaGene Matrix (Bio-rad laboratories, Hercules, USA) + High-speed homogeneizer	6I	150	5.89	883.5	1140.5	1.45	1.32
InstaGene Matrix (Bio-rad laboratories, Hercules, USA) + High-speed homogeneizer	6J	150	3.95	592.5	1133.3	1.45	1.31
FluoroLyse buffer Hain Lifescience (Nehren, Germany)	7A	200	0.489	97.8	16.5	1.65	1.99
FluoroLyse buffer Hain Lifescience (Nehren, Germany)	7B	200	0.334	66.8	39.2	1.55	3.05
FluoroLyse buffer Hain Lifescience (Nehren, Germany)	7C	200	0.356	71.2	42.7	1.59	1.52
FluoroLyse buffer Hain Lifescience (Nehren, Germany)	7D	200	0.324	64.8	36.1	1.6	1.74
FluoroLyse buffer Hain Lifescience (Nehren, Germany)	7E	200	0.347	69.4	47.9	1.42	2.69
FluoroLyse buffer Hain Lifescience (Nehren, Germany)	7F	200	0.5	100	24	1.71	2.68
FluoroLyse buffer Hain Lifescience (Nehren, Germany)	7G	200	0.532	106.4	40	1.53	1.75
FluoroLyse buffer Hain Lifescience (Nehren, Germany)	7H	200	0.426	85.2	41.3	1.56	2.2
FluoroLyse buffer Hain Lifescience (Nehren, Germany)	7I	200	0.194	38.8	30.3	1.61	2.65
FluoroLyse buffer Hain Lifescience (Nehren, Germany)	7J	200	0.183	36.6	35.4	1.56	3.72
GenoLyse buffer Hain Lifescience (Nehren, Germany)	8A	200	0.651	130.2	23.1	0.33	0.33
GenoLyse buffer Hain Lifescience (Nehren, Germany)	8B	200	0.701	140.2	38.4	1.3	0.75
GenoLyse buffer Hain Lifescience (Nehren, Germany)	8C	200	0.561	112.2	41.3	1.05	0.38
GenoLyse buffer Hain Lifescience (Nehren, Germany)	8D	200	0.559	111.8	52.7	1.17	0.46
GenoLyse buffer Hain Lifescience (Nehren, Germany)	8E	200	0.717	143.4	39.7	1.23	0.62
GenoLyse buffer Hain Lifescience (Nehren, Germany)	8F	200	0.665	133	36.9	1.22	0.61
GenoLyse buffer Hain Lifescience (Nehren, Germany)	8G	200	0.704	140.8	29.2	1.08	0.49
GenoLyse buffer Hain Lifescience (Nehren, Germany)	8H	200	0.878	175.6	39	1.15	0.52
GenoLyse buffer Hain Lifescience (Nehren, Germany)	8I	200	0.881	176.2	40.9	1.19	0.55
GenoLyse buffer Hain Lifescience (Nehren, Germany)	8J	200	0.828	165.6	56.3	0.93	0.29
Xpert MTB/RIF assay buffer (Cepheid, Sunnyval, USA) + CTAB	9A	25	0.308	7.7	310.6	2.03	0.8
Xpert MTB/RIF assay buffer (Cepheid, Sunnyval, USA) + CTAB	9B	25	0.258	6.45	270.7	2.01	0.74
Xpert MTB/RIF assay buffer (Cepheid, Sunnyval, USA) + CTAB	9C	25	0.292	7.3	244.9	2.24	0.81
Xpert MTB/RIF assay buffer (Cepheid, Sunnyval, USA) + CTAB	9D	25	0.601	15.025	464	2.07	1.07
Xpert MTB/RIF assay buffer (Cepheid, Sunnyval, USA) + CTAB	9E	25	"Too low" (Undetected)	0	148.5	2.34	0.79
Xpert MTB/RIF assay buffer (Cepheid, Sunnyval, USA) + CTAB	9F	25	0.28	7	239.9	2.25	0.84
Xpert MTB/RIF assay buffer (Cepheid, Sunnyval, USA) + CTAB	9G	25	0.17	4.25	90.3	1.98	0.63
Xpert MTB/RIF assay buffer (Cepheid, Sunnyval, USA) + CTAB	9H	25	0.788	19.7	256.5	2.2	0.85
Xpert MTB/RIF assay buffer (Cepheid, Sunnyval, USA) + CTAB	9I	25	"Too low" (Undetected)	0	129.6	2.23	0.81
Xpert MTB/RIF assay buffer (Cepheid, Sunnyval, USA) + CTAB	9J	25	0.664	16.6	321.7	2.17	0.86
PrepGEM Bacteria kit (MicroGem, Southampton, UK)	12A	100	0.393	39.3	26.1	1.16	0.05
PrepGEM Bacteria kit (MicroGem, Southampton, UK)	12B	100	0.433	43.3	30.6	1.44	0.1
PrepGEM Bacteria kit (MicroGem, Southampton, UK)	12C	100	0.378	37.8	32.4	1.46	0.11
PrepGEM Bacteria kit (MicroGem, Southampton, UK)	12D	100	0.363	36.3	29.9	1.46	0.09
PrepGEM Bacteria kit (MicroGem, Southampton, UK)	12E	100	0.371	37.1	30.3	1.37	0.08
PrepGEM Bacteria kit (MicroGem, Southampton, UK)	12F	100	0.432	43.2	28.3	1.38	0.08
PrepGEM Bacteria kit (MicroGem, Southampton, UK)	12G	100	0.479	47.9	31	1.41	0.09
PrepGEM Bacteria kit (MicroGem, Southampton, UK)	12H	100	0.558	55.8	31.6	1.35	0.08
PrepGEM Bacteria kit (MicroGem, Southampton, UK)	12I	100	0.451	45.1	28.4	1.3	0.07
PrepGEM Bacteria kit (MicroGem, Southampton, UK)	12J	100	0.282	28.2	23.1	1.23	0.05
FluoroLyse buffer Hain Lifescience (Nehren, Germany) + Ethanol Precipitation	7A	25	0.686	17.15	19.4	1.77	-7.94
FluoroLyse buffer Hain Lifescience (Nehren, Germany) + Ethanol Precipitation	7B	25	1.08	27	30.8	1.92	1.76
FluoroLyse buffer Hain Lifescience (Nehren, Germany) + Ethanol Precipitation	7C	25	4.08	102	47	1.79	2.41
FluoroLyse buffer Hain Lifescience (Nehren, Germany) + Ethanol Precipitation	7D	25	1.15	28.75	36.6	1.85	2.32
FluoroLyse buffer Hain Lifescience (Nehren, Germany) + Ethanol Precipitation	7E	25	1.17	29.25	32.9	1.87	1.26
FluoroLyse buffer Hain Lifescience (Nehren, Germany) + Ethanol Precipitation	7F	25	1.22	30.5	44.1	1.8	1.06
FluoroLyse buffer Hain Lifescience (Nehren, Germany) + Ethanol Precipitation	7G	25	2.95	73.75	49.6	1.75	1.38
FluoroLyse buffer Hain Lifescience (Nehren, Germany) + Ethanol Precipitation	7H	25	1.66	41.5	26.5	1.81	2.73
FluoroLyse buffer Hain Lifescience (Nehren, Germany) + Ethanol Precipitation	7I	25	0.8	20	33	1.87	0.96
FluoroLyse buffer Hain Lifescience (Nehren, Germany) + Ethanol Precipitation	7J	25	1.09	27.25	24.1	1.8	15.59
GenoLyse buffer Hain Lifescience (Nehren, Germany) + Ethanol Precipitation	8A	25	2.95	73.75	50.6	1.17	0.33
GenoLyse buffer Hain Lifescience (Nehren, Germany) + Ethanol Precipitation	8B	25	3.07	76.75	320.1	1.14	0.85
GenoLyse buffer Hain Lifescience (Nehren, Germany) + Ethanol Precipitation	8C	25	1.87	46.75	870	1.22	0.72
GenoLyse buffer Hain Lifescience (Nehren, Germany) + Ethanol Precipitation	8D	25	2.13	53.25	288	1.15	0.61
GenoLyse buffer Hain Lifescience (Nehren, Germany) + Ethanol Precipitation	8E	25	2.26	56.5	126.5	1.26	0.53
GenoLyse buffer Hain Lifescience (Nehren, Germany) + Ethanol Precipitation	8F	25	2.32	58	141.9	1.12	1.33
GenoLyse buffer Hain Lifescience (Nehren, Germany) + Ethanol Precipitation	8G	25	1.22	30.5	646	1.29	0.59
GenoLyse buffer Hain Lifescience (Nehren, Germany) + Ethanol Precipitation	8H	25	1.96	49	82.7	1.18	0.46
GenoLyse buffer Hain Lifescience (Nehren, Germany) + Ethanol Precipitation	8I	25	2.23	55.75	54.6	1.19	0.38
GenoLyse buffer Hain Lifescience (Nehren, Germany) + Ethanol Precipitation	8J	25	2.48	62	85.8	0.99	0.29
Xpert MTB/RIF assay buffer (Cepheid, Sunnyval, USA) + Ethanol Precipitation	11A	25	2.65	66.25	200.7	1.58	0.67
Xpert MTB/RIF assay buffer (Cepheid, Sunnyval, USA) + Ethanol Precipitation	11B	25	8.85	221.25	323.2	1.6	0.79
Xpert MTB/RIF assay buffer (Cepheid, Sunnyval, USA) + Ethanol Precipitation	11C	25	8.26	206.5	377.2	1.6	0.69
Xpert MTB/RIF assay buffer (Cepheid, Sunnyval, USA) + Ethanol Precipitation	11D	25	4.79	119.75	547	1.53	0.79
Xpert MTB/RIF assay buffer (Cepheid, Sunnyval, USA) + Ethanol Precipitation	11E	25	8.95	223.75	267.6	1.62	0.78
Xpert MTB/RIF assay buffer (Cepheid, Sunnyval, USA) + Ethanol Precipitation	11F	25	9.94	248.5	260.3	1.59	0.79
Xpert MTB/RIF assay buffer (Cepheid, Sunnyval, USA) + Ethanol Precipitation	11G	25	6.56	164	145.1	1.69	0.64
Xpert MTB/RIF assay buffer (Cepheid, Sunnyval, USA) + Ethanol Precipitation	11H	25	9.1	227.5	349.7	1.57	0.89
Xpert MTB/RIF assay buffer (Cepheid, Sunnyval, USA) + Ethanol Precipitation	11I	25	9.25	231.25	150.4	1.86	0.67
Xpert MTB/RIF assay buffer (Cepheid, Sunnyval, USA) + Ethanol Precipitation	11J	25	13.9	347.5	201.4	1.66	0.75
PrepGEM Bacteria kit (MicroGem, Southampton, UK) + Ethanol Precipitation	10A	25	0.761	19.025	61.7	3.22	2.22
PrepGEM Bacteria kit (MicroGem, Southampton, UK) + Ethanol Precipitation	10B	25	0.492	12.3	80.9	3.18	4.42
PrepGEM Bacteria kit (MicroGem, Southampton, UK) + Ethanol Precipitation	10C	25	0.382	9.55	97.1	3.02	11.6
PrepGEM Bacteria kit (MicroGem, Southampton, UK) + Ethanol Precipitation	10D	25	1.42	35.5	111.2	1.93	0.38
PrepGEM Bacteria kit (MicroGem, Southampton, UK) + Ethanol Precipitation	10E	25	1.03	25.75	185.3	1.72	0.34
PrepGEM Bacteria kit (MicroGem, Southampton, UK) + Ethanol Precipitation	10F	25	0.572	14.3	107.7	2.33	0.36
PrepGEM Bacteria kit (MicroGem, Southampton, UK) + Ethanol Precipitation	10G	25	0.546	13.65	64.1	2.98	2.45
PrepGEM Bacteria kit (MicroGem, Southampton, UK) + Ethanol Precipitation	10H	25	0.827	20.675	60.3	2.95	1.51
PrepGEM Bacteria kit (MicroGem, Southampton, UK) + Ethanol Precipitation	10I	25	0.54	13.5	56.7	2.49	0.08
PrepGEM Bacteria kit (MicroGem, Southampton, UK) + Ethanol Precipitation	10J	25	0.586	14.65	73.2	3.56	3.99
MN NucleoSpin Tissue kit (Macherey-Nagel, Düren, Germany)	13A	50	1.44	72	2.2	2.38	6.39
MN NucleoSpin Tissue kit (Macherey-Nagel, Düren, Germany)	13B	50	1.28	64	1.7	2.32	5.85
MN NucleoSpin Tissue kit (Macherey-Nagel, Düren, Germany)	13C	50	1.22	61	2.2	2.17	-11.38
MN NucleoSpin Tissue kit (Macherey-Nagel, Düren, Germany)	13D	50	1.42	71	2.1	2.13	5.42
MN NucleoSpin Tissue kit (Macherey-Nagel, Düren, Germany)	13E	50	1.27	63.5	1.8	3.91	18.12
MN NucleoSpin Tissue kit (Macherey-Nagel, Düren, Germany)	13F	50	0.831	41.55	2.6	1.96	1.67
MN NucleoSpin Tissue kit (Macherey-Nagel, Düren, Germany)	13G	50	1.2	60	1.5	2.08	3.5
MN NucleoSpin Tissue kit (Macherey-Nagel, Düren, Germany)	13H	50	1.24	62	2	2.44	1.42
MN NucleoSpin Tissue kit (Macherey-Nagel, Düren, Germany)	13I	50	1.35	67.5	2.3	1.97	1.51
MN NucleoSpin Tissue kit (Macherey-Nagel, Düren, Germany)	13J	50	1	50	1.5	2.87	8.63
MN NucleoMag Pathogen kit (Macherey-Nagel, Düren, Germany)	14A	50	9.18	459	42.2	3.19	2.62
MN NucleoMag Pathogen kit (Macherey-Nagel, Düren, Germany)	14B	50	9.23	461.5	50.2	3.07	1.99
MN NucleoMag Pathogen kit (Macherey-Nagel, Düren, Germany)	14C	50	7.4	370	35.9	3.21	2.48
MN NucleoMag Pathogen kit (Macherey-Nagel, Düren, Germany)	14D	50	8.08	404	31.6	3.19	2.29
MN NucleoMag Pathogen kit (Macherey-Nagel, Düren, Germany)	14E	50	6.02	301	38.4	2.75	1.2
MN NucleoMag Pathogen kit (Macherey-Nagel, Düren, Germany)	14F	50	7.51	375.5	48.2	2.5	1.29
MN NucleoMag Pathogen kit (Macherey-Nagel, Düren, Germany)	14G	50	7.88	394	55.3	2.64	1.36
MN NucleoMag Pathogen kit (Macherey-Nagel, Düren, Germany)	14H	50	8.35	417.5	51.7	2.18	1.07
MN NucleoMag Pathogen kit (Macherey-Nagel, Düren, Germany)	14I	50	8.75	437.5	51.1	2.99	1.58
MN NucleoMag Pathogen kit (Macherey-Nagel, Düren, Germany)	14J	50	6.91	345.5	40.3	2.44	1.23
