# Supplementary material for: Evaluation of DNA extraction methods for clinical Mycobacterium tuberculosis primary liquid culture for whole-genome sequencing
Source: Research Square preprint supplement (doi:10.21203/rs.3.rs-7905849/v1), 2025-11-18
Supplement: Supplementary file 5 [file cpc_kits_suppl_table_2.xls]

## Sheet: Supplementary Table 2
Supplementary Table 2. Quality control and results for DNA extraction, Library Preparation and Whole-genome sequencing based on three selected samples for each DNA extraction method.
		gDNA before Library Prep							LIBRARY PREP: Tris-HCL ph8 dilution (if needed)					LIBRARY PREP: NFW dilution (if performed TrisHCL dil, use it as base)					LIBRARY PREP: diution to 2nM							Pool dilution and denaturation									1st working solution- Starting point: 20 pM, Input conc.: 1.3 pM, PhiX spike: 3%							Final load on cartridge			BIONFORMATIC MAGMA OUTPUT
DNA Extraction Method/Sample ID	Genome ID	gDNA before others QC and bead cleanup (ng/uL)/ [Vol(uL)]	Total dsDNA	Nuleic Acid concentration (ng/uL) - Nanodrop	Nanodrop (280/260). Quantification of protein light absorbance against the expect DNA light absorbance	Nanodrop (280/230). Quantification of salt light absorbance against the expect DNA light absorbance	gDNA after all QCs and before bead cleanup (ng/uL)	gDNA after bead cleanup (ng/uL) ressuspended in different vol to concetrate the DNA	HS dsDNA Qubit (ng/ul)	Final vol. (ul)	Final conc. (ng/ul)	Vol. sample (ul)	Vol. Tris (ul)	gDNA input conc. (ng)	Final Vol. (ul)	Vol. sample (ul)	Vol. NFW (ul)	PCR cycles	Library conc. (ng/uL) [Qubit HS]	Library frag. Size (bp)	Libraries in nM	Final conc. (nM)	Final vol. (ul)	Vol. sample (ul)	Vol. RSB (ul)	Qubit Pool	Average fragment size	Libraries in pM	Final conc. in pM	Final vol. of 20 pM	Library Pool vol. (ul)	Vol. of 0.1 M NaOH (ul)	Vol. of 200 mM Tris-HCl, pH 7 (ul)	Vol. of HT1 Buffer (ul)	Pool of 2nM libraries	Libraries in pM	Final conc. in pM	Final vol. (ul)	PhiX %	%/100	Library Pool vol. (ul)	3% PhiX vol. (ul)	Vol. of library to use (ul)	Vol. HT1 buffer (ul)	AVG_INSERT_SIZE	MAPPED_PERCENTAGE	RAW_TOTAL_SEQS	AVERAGE_BASE_QUALITY	MEAN_COVERAGE
CTAB (1B)	ERS27189064	13,1 [25]	327.5	52.4	2.01	1.31	-	-	9.39	-	-	-	-	20	30	2.12993	27.8701	10cycles	22.4	490	69.2641	2	65	1.87688	63.1231	1.04	656	2400	20	1000	8.33333	8.33333	8.33333	975	Yes	20	1.3	550	3	0.03	35.8	1	34.7	514.3	271	79.77	5419314	35.2	107.717
CTAB (1G)	ERS27189065	12,5 [25]	312.5	65.9	1.96	1.3	10	9,01 [9]	9.01	-	-	-	-	20	30	2.21976	27.7802	10 cycles	3.72	869	6.48603	2	10	3.08355	6.91645	1.04	656	2400	20	1000	8.33333	8.33333	8.33333	975	Yes	20	1.3	550	3	0.03	35.8	1	34.7	514.3	248.8	75.46	7883246	35.3	137.883
CTAB (1H)	ERS27189066	11,3 [25]	282.5	41.1	1.98	1.14	-	-	8.15	-	-	-	-	20	30	2.45399	27.546	10cycles	17.5	472	57.1392	2	60	2.10013	57.8999	0.466	507.75	1400	20	1000	14.2857	14.2857	14.2857	957.143	Yes	20	1.3	550	3	0.03	35.8	1	34.7	514.3	257	70.19	6839040	35.5	116.765
CTAB+RNase (2C)	ERS27189067	15,5 [25]	387.5	54.9	1.96	1.22	9.28 [25]	19.8 [10]	19.8	5	10	2.5	2.5	20	30	2	28	10 cycles	12.4	445	42.2	2	45	2.1	42.9	0.753	542.6	2100	20	1000	9.52	9.52	9.52	971.43	Yes	20	1.3	550	3	0.03	35.8	1	34.7	514.3	264.6	80.17	5828394	35.7	116.744
CTAB+RNase (2D)	ERS27189068	15,9 [25]	397.5	41.9	1.97	1.23	9.28	19,8 [9]	7.91	-	-	-	-	20	30	2.52845	27.4716	10cycles	16.7	487	-	-	-	-	-	-	-	-	-	-	-	-	-	-	-	-	-	-	-	-	-	-	-	-	-	-	-	-	-
CTAB+RNase (2F)	ERS27189069	15,5 [25]	387.5	53.2	2.02	1.58	12,8 [28]	20,9 [10]	26.4	5	10	1.89394	3.10606	20	30	2	28	10 cycles	14.5	656	33.4904	2	40	2.38874	37.6113	1.04	656	2400	20	1000	8.33333	8.33333	8.33333	975	Yes	20	1.3	550	3	0.03	35.8	1	34.7	514.3	322.6	80.17	5637110	35.1	118.273
Zymo-DNAconc (3C)	ERS27189070	1,07 [50]	53.5	2.4	4.53	0.43	0.601	0,478 [8]	0.478	-	-	-	-	4	30	8.3682	21.6318	12cycles	3.69	542	10.3153	2	10	1.93886	8.06114	1.04	656	2400	20	1000	8.33333	8.33333	8.33333	975	Yes	20	1.3	550	3	0.03	35.8	1	34.7	514.3	306.6	77.21	5704198	35.2	119.072
Zymo-DNAconc (3H)	ERS27189071	1,04 [50]	52	2.8	2.36	0.5	0,756 [40]	2,27 [10]	2.65	-	-	-	-	16	30	6.03774	23.9623	10cycles	9.97	625	24.1697	2	25	2.06871	22.9313	0.728	533.6	2100	20	1000	9.52381	9.52381	9.52381	971.429	Yes	20	1.3	550	3	0.03	35.8	1	34.7	514.3	326.4	78.18	5842998	35.6	125.036
Zymo-DNAconc (3G)	No WGS data	0,949 [50]	47.45	2.7	2.31	0.71	Undetected [16]	0.05 [10]	0.05	-	-	-	-	0.4	30	8	22	14cycles	Undetected	Undetected	-	-	-	-	-	-	-	-	-	-	-	-	-	-	-	-	-	-	-	-	-	-	-	-	-	-	-	-	-
Zymo Quick Fung/Bac (4E)	ERS27189072	Undetected [50]	Unknown	1.2	7.03	0.02	Undetected [25,3]	0.059 [10]	0.059	-	-	-	-	0.3	30	5.1	24.9	14cycles	2.67	534	7.6	2	8	2.1	5.9	0.753	542.6	2100	20	1000	9.52	9.52	9.52	971.43	Yes	20	1.3	550	3	0.03	35.8	1	34.7	514.3	325.9	88.21	5145184	35.6	125.733
Zymo Quick Fung/Bac (4J)	ERS27189073	Undetected [50]	Unknown	2.8	2.16	3	Undetected [24,4]	0,078 [10]	0.082	-	-	-	-	0.4	30	4.87805	25.122	14cycles	1.55	723	3.24825	2	10	6.15716	3.84284	1.04	656	2400	20	1000	8.33333	8.33333	8.33333	975	Yes	20	1.3	550	3	0.03	35.8	1	34.7	514.3	368.7	71.99	4891084	35	96.7202
Zymo Quick Fung/Bac (4A)	No WGS data	Undetected [50]	Unknown	7.9	1.55	0.02	Undetected [8]	Undetected [10]	Undetected	-	-	-	-	20	30	-	-	14cycles	0.202	Undetected	-	-	-	-	-	-	-	-	-	-	-	-	-	-	-	-	-	-	-	-	-	-	-	-	-	-	-	-	-
IGM (5E)	ERS27189074	0,075 [150]	11.25	14.4	1.52	0.58	0.081 [100]	0.152 [22]	0.152	-	-	-	-	3.35	30	22	8	12cycles	8.08	489	25	2	25	2	23	0.753	542.6	2100	20	1000	9.52	9.52	9.52	971.43	Yes	20	1.3	550	3	0.03	35.8	1	34.7	514.3	382	78.11	4536176	35.8	89.5286
IGM (5H)	ERS27189075	0,103 [150]	15.45	17.2	1.46	0.55	-	-	0.122	-	-	-	-	3.6	30	29.5082	0.491803	12 cycles	9.91	485	30.9591	2	35	2.26105	32.739	0.739	659.2	1700	20	1000	11.7647	11.7647	11.7647	964.706	Yes	20	1.3	550	3	0.03	35.8	1	34.7	514.3	253.8	72.48	7275602	35.3	123.826
IGM (5J)	ERS27189076	0,082 [150]	12.3	15.9	1.48	0.51	-	-	0.275	-	-	-	-	3	30	10.9091	19.0909	14cycles	12.5	475	39.8724	2	40	2.0064	37.9936	0.728	533.6	2100	20	1000	9.52381	9.52381	9.52381	971.429	Yes	20	1.3	550	3	0.03	35.8	1	34.7	514.3	239	70.55	7556788	35.7	122.059
IGM/FP (6E)	ERS27189077	4,47 [150]	670.5	1134.6	1.45	1.31	2,57 [123]	5,90 [20]	5.85	-	-	-	-	20	30	3.4188	26.5812	10cycles	12.9	686	28.4919	2	35	2.45684	32.5432	0.739	659.2	1700	20	1000	11.7647	11.7647	11.7647	964.706	Yes	20	1.3	550	3	0.03	35.8	1	34.7	514.3	343.1	76.9	4368014	35.2	90.8439
IGM/FP (6F)	ERS27189078	4,46 [150]	669	1126.6	1.44	1.32	3.34 [147]	8.22 [20]	8.22	-	-	-	-	20	30	2.4	27.6	10cycles	16.8	515	49.4	2	50	2	48	0.753	542.6	2100	20	1000	9.52	9.52	9.52	971.43	Yes	20	1.3	550	3	0.03	35.8	1	34.7	514.3	319.2	83.91	4211586	35.6	97.8201
IGM/FP (6H)	ERS27189079	4,93 [150]	739.5	1125.4	1.44	1.32	-	-	2.54	-	-	-	-	16	30	6.29921	23.7008	10 cycles	5.31	533	15.0947	2	15	1.98746	13.0125	0.728	533.6	2100	20	1000	9.52381	9.52381	9.52381	971.429	Yes	20	1.3	550	3	0.03	35.8	1	34.7	514.3	249.3	78.42	6217856	35.7	115.68
Fluorolyse+Prec (7D)	ERS27189080	1,15 [25]	28.75	36.1	1.6	1.74	1.24 [10]	0.408 [10]	0.408	-	-	-	-	3.7	30	9.1	20.9	12cycles	8.22	730 + 373	17.1	2	18	2.1	15.9	0.753	542.6	2100	20	1000	9.52	9.52	9.52	971.43	Yes	20	1.3	550	3	0.03	35.8	1	34.7	514.3	218.2	67.29	9112654	35.8	131.251
Fluorolyse+Prec (7F)	ERS27189081	1,22 [25]	30.5	24	1.71	2.68	-	-	0.2	-	-	-	-	2	30	10	20	14cycles	3.18	558	8.63473	2	10	2.31623	7.68377	0.728	533.6	2100	20	1000	9.52381	9.52381	9.52381	971.429	Yes	20	1.3	550	3	0.03	35.8	1	34.7	514.3	425.6	81.02	6090728	35.6	132.623
Fluorolyse+Prec (7H)	ERS27189082	1,66 [25]	41.5	41.3	1.56	2.2	-	-	0.22	-	-	-	-	2	30	9.09091	20.9091	14cycles	2.78	754	5.58637	2	10	3.58014	6.41986	0.739	659.2	1700	20	1000	11.7647	11.7647	11.7647	964.706	Yes	20	1.3	550	3	0.03	35.8	1	34.7	514.3	242.5	56.59	9247550	35.4	119.024
Genolyse+Prec (8D)	ERS27189083	2,13 [25]	53.25	288	1.15	0.61	2,58 [17]	2,61 [10]	2.79	-	-	-	-	15.5	30	5.55556	24.4444	10cycles	3.77	748	7.63653	2	10	2.61899	7.38101	0.739	659.2	1700	20	1000	11.7647	11.7647	11.7647	964.706	Yes	20	1.3	550	3	0.03	35.8	1	34.7	514.3	627.2	81.22	3758584	35.1	83.9345
Genolyse+Prec (8E)	ERS27189084	2,26 [25]	56.5	126.5	1.26	0.53	2.82	1,37 [7]	1.37	-	-	-	-	10	30	7.29927	22.7007	10 cycles	4.72	531	13.468	2	14	2.079	11.921	0.739	589.138	2100	20	1000	9.52381	9.52381	9.52381	971.429	Yes	20	1.3	550	3	0.03	35.8	1	34.7	514.3	576	81.73	6820146	35.7	146.081
Genolyse+Prec (8I)	ERS27189085	2,23 [25]	55.75	54.6	1.19	0.38	2,55 [24]	2,65 [10]	2.65	-	-	-	-	20	30	7.5	22.5	10cycles	6	454	20	2	20	2	18	0.675	437	2100	20	1000	9.52	9.52	9.52	971.43	Yes	20	1.3	550	3	0.03	35.8	1	34.7	514.3	522.5	80.68	3115290	35.7	66.8929
Xpert+purif (9F)	No WGS data	0,28 [25]	7	239.9	2.25	0.84	0,053 [14.4]	0,055 [10]	0.055	-	-	-	-	1	30	18.2	11.8	12cycles	Undetected	Undetected	-	-	-	-	-	-	-	-	-	-	-	-	-	-	-	-	-	-	-	-	-	-	-	-	-	-	-	-	-
Xpert+purif (9C)	No WGS data	0,292 [25]	7.3	244.9	2.24	0.81	0,414 [2]	Undetected [10]	Undetected	-	-	-	-	<1	30	-	-	14cycles	Undetected	Undetected	-	-	-	-	-	-	-	-	-	-	-	-	-	-	-	-	-	-	-	-	-	-	-	-	-	-	-	-	-
Xpert+purif (9J)	No WGS data	0,664 [25]	16.6	321.7	2.17	0.86	0.09	Undetected [12]	Undetected	-	-	-	-	<1	30	-	-	14cycles	Undetected	Undetected	-	-	-	-	-	-	-	-	-	-	-	-	-	-	-	-	-	-	-	-	-	-	-	-	-	-	-	-	-
PrepGem+Prec (10F)	ERS27189086	0,572 [25]	14.3	107.7	2.33	0.36	0,237 [158]	0,137 [20]	0.137	-	-	-	-	2.5	30	18.2	11.8	12cycles	2.78	415	10.1	2	10	2	8	0.675	437	2100	20	1000	9.52	9.52	9.52	971.43	Yes	20	1.3	550	3	0.03	35.8	1	34.7	514.3	238.8	75.99	2073026	35.8	38.0684
PrepGem+Prec (10G)	ERS27189087	0,546 [25]	13.65	64.1	2.98	2.45	0,051 [184]	Undetected [20]	0.061	-	-	-	-	1.22	30	20	10	14cycles	3.48	623	8.46345	2	10	2.3631	7.6369	0.739	659.2	1700	20	1000	11.7647	11.7647	11.7647	964.706	Yes	20	1.3	550	3	0.03	35.8	1	34.7	514.3	269.7	67.53	7002274	35.3	114.781
PrepGem+Prec (10J)	ERS27189088	0,586 [25]	14.65	73.2	3.56	3.99	0,079 [194]	0,068 [20]	0.068	-	-	-	-	<1	30	-	-	14cycles	5.25	485	16.4011	2	16	1.95109	14.0489	0.739	589.138	2100	20	1000	9.52381	9.52381	9.52381	971.429	Yes	20	1.3	550	3	0.03	35.8	1	34.7	514.3	257.3	72.24	7608070	35.7	134.331
Xpert+precip (11E)	No WGS data	8,95 [25]	223.75	267.6	1.62	0.78	10,3 [23,8]	0,554 [18]	0.554	-	-	-	-	10	30	18.1	11.9	12cycles	Undetected	Undetected	-	-	-	-	-	-	-	-	-	-	-	-	-	-	-	-	-	-	-	-	-	-	-	-	-	-	-	-	-
Xpert+precip (11B)	No WGS data	8,85 [25]	221.25	323.2	1.6	0.79	7,72 [18]	0,692 [18]	0.681	-	-	-	-	9	30	13.2159	16.7841	10cycles	Undetected	Undetected	-	-	-	-	-	-	-	-	-	-	-	-	-	-	-	-	-	-	-	-	-	-	-	-	-	-	-	-	-
Xpert+precip (11C)	No WGS data	8,26 [25]	206.5	377.2	1.6	0.69	-	-	0.599	-	-	-	-	5.4	30	9.01503	20.985	14cycles	Undetected	Undetected	-	-	-	-	-	-	-	-	-	-	-	-	-	-	-	-	-	-	-	-	-	-	-	-	-	-	-	-	-
PrepGem (12A)	ERS27189089	0,393 [100]	39.3	26.1	1.16	0.05	3,07 [68]	1,68 [20]	1.68	-	-	-	-	20	30	11.9	18.1	10cycles	1.73	450	5.8	2	6	2.1	3.9	0.675	437	2100	20	1000	9.52	9.52	9.52	971.43	Yes	20	1.3	550	3	0.03	35.8	1	34.7	514.3	236.8	61.41	3996632	35.7	58.1577
PrepGem (12C)	ERS27189090	0,378 [100]	37.8	32.4	1.46	0.11	3,22 [84]	1,94 [22]	2.07	-	-	-	-	20	30	9.66184	20.3382	10cycles	2.28	571	6	2	10	3.3	6.7	0.466	507.75	1400	20	1000	14.2857	14.2857	14.2857	957.143	Yes	20	1.3	550	3	0.03	35.8	1	34.7	514.3	250.1	65.04	8149608	35.4	125.199
PrepGem (12F)	ERS27189091	0,432 [100]	43.2	28.3	1.38	0.08	1,93 [130]	1,32 [22]	1.32	-	-	-	-	14	30	10.6061	19.3939	10cycles	2.95	482	9.27323	2	10	2.15675	7.84325	0.739	589.138	2100	20	1000	9.52381	9.52381	9.52381	971.429	Yes	20	1.3	550	3	0.03	35.8	1	34.7	514.3	246.6	62.04	7456640	35.8	112.471
NucleoSpin (13B)	ERS27189092	1,28 [50]	64	1.7	2.32	5.85	-	-	1.29	-	-	-	-	15	30	11.6279	18.3721	10cycles	14	477	44.4699	2	45	2.02384	42.9762	0.728	533.6	2100	20	1000	9.52381	9.52381	9.52381	971.429	Yes	20	1.3	550	3	0.03	35.8	1	34.7	514.3	288.1	52.19	5636380	35.7	79.4531
NucleoSpin (13G)	ERS27189093	1,2 [50]	60	1.5	2.08	3.5	-	-	1.75	-	-	-	-	14	30	8	22	10cycles	0.239	Undetected	-	-	-	-	-	0.466	507.75	1400	20	1000	14.2857	14.2857	14.2857	957.143	Yes	20	1.3	550	3	0.03	35.8	1	34.7	514.3
NucleoSpin (13H)	ERS27189094	1,24 [50]	62	2	2.44	1.42	0,482 [47]	1,84 [18]	0.554	-	-	-	-	10	30	18.1	11.9	12cycles	18.5	453	61.9	2	65	2.1	62.9	0.675	437	2100	20	1000	9.52	9.52	9.52	971.43	Yes	20	1.3	550	3	0.03	35.8	1	34.7	514.3	266.6	44.55	10029908	35.8	113.956
NucleoMag (14D)	ERS27189095	8,08 [50]	404	31.6	3.19	2.29	5,93 [31]	5,5 [18]	5.5	-	-	-	-	20	30	3.63636	26.3636	10cycles	13.3	511	39.4355	2	40	2.02863	37.9714	0.466	507.75	1400	20	1000	14.2857	14.2857	14.2857	957.143	Yes	20	1.3	550	3	0.03	35.8	1	34.7	514.3	267	10.24	6319910	35.4	16.5312
NucleoMag (14F)	ERS27189096	7,51 [50]	375.5	48.2	2.5	1.29	5,57 [28]	5,28 [18]	6.25	-	-	-	-	20	30	3.2	26.8	10cycles	14.4	622	35.0775	2	35	1.99558	33.0044	0.739	589.138	2100	20	1000	9.52381	9.52381	9.52381	971.429	Yes	20	1.3	550	3	0.03	35.8	1	34.7	514.3	315	8.46	6960190	35.6	16.1604
NucleoMag (14G)	ERS27189097	7,88 [50]	394	55.3	2.64	1.36	6,26 [31]	5,81 [18]	1.84	-	-	-	-	20	30	10.9	19.1	10cycles	13.5	430	47.6	2	50	2.1	47.9	0.675	437	2100	20	1000	9.52	9.52	9.52	971.43	Yes	20	1.3	550	3	0.03	35.8	1	34.7	514.3	251.1	8.74	8921020	35.8	20.0413
[truncated: 15 more columns]
