# Supplementary material for: Evaluation of DNA extraction methods for clinical Mycobacterium tuberculosis primary liquid culture for whole-genome sequencing
Source: Research Square preprint supplement (doi:10.21203/rs.3.rs-7905849/v1), 2025-11-18
Supplement: Supplementary file 6 [file cpc_kits_suppl_table_3.xlsx]

## Sheet: Supplementary Table 3
Supplementary Table 3. DNA Extraction methods scored according to the 10 criteria.
DNA extraction method	Samples ID	1. Total dsDNA Quantity	1. Total dsDNA Quantity Score	2. DNA Quality (Nanodrop 260/280)	2. DNA Quality (Nanodrop 260/280) Score	3. DNA Quality (Nanodrop 260/230)	3. DNA Quality (Nanodrop 260/230) Score	4. DNA fragment size (pncA PCR) score	5. Library concentration (ng/ul)	5. Library concentration (ng/ul) Score	6. Library fragment size (pb)	6. Library fragment size (pb) Score	7. WGS QC (Mapped %)	7. WGS QC (Mapped %) score	8. WGS QC (Coverage 5M reads)	8. WGS QC (Coverage 5M reads) score	9. DNA Extraction Turnaround time (minutes)	9. DNA Extraction Turnaround time (minutes) score	10. DNA Extraction Cost per sample (ZAR)	10. DNA Extraction Cost per sample (EUR)	10. DNA Extraction Cost per sample score	Total Score
InstaGene Matrix/Rybolyzer Homogeneizer (RH)	6A – 6J	669.75	5	1.44	3	1.32	4	5	11.67	5	578	5	79.7433	4	106.688	4	100	5	15.0958	0.744371	5	45
InstaGene Matrix	5A – 5J	10.95	3	1.52	4	0.57	3	5	10.1633	5	483	4	73.7133	4	90.3257	4	80	5	14.9758	0.738454	5	42
CTAB/RNase	2A – 2J	387.5	5	2	5	1.44	4	5	13.45	5	550 (atypical peak)	4	80.17	5	106.021	4	> 480	1	83.437	4.11425	2	40
Fluorolyse/Precipitation	7A – 7J	29	3	1.81	5	1.57	5	5	4.72667	3	680 (atypical peak)	4	68.3	3	83.5307	3	195	4	35.055	1.72855	4	39
Genolyse/Precipitation	8A – 8J	56.12	4	1.17	3	0.56	3	4	4.83	3	577.667	5	81.21	5	110.239	5	195	4	31.7161	1.56391	4	40
NucleoMag® Pathogen kit	14A – 14J	399	5	2.87	2	1.47	4	5	13.7333	5	521	5	9.14667	1	12.051	1	160	3	82.7771	4.08171	2	33
PrepGem kit/Precipitation	10A – 10J	14.48	3	2.96	2	1.87	5	5	3.83667	3	507.667	5	71.92	4	89.8914	3	175	3	132.334	6.52535	1	34
NucleoSpin® Tissue kit*	13A – 13J	62.75	4	2.24	3	4.46	1	5	16.25	5	465	4	48.37	2	65.5336	2	180	3	71.616	3.53136	2	31
PrepGem Kit	12A – 12J	41.25	3	1.38	3	0.08	1	5	2.32	3	501 (atypical peak)	4	62.83	3	76.9134	3	105	4	119.154	5.87544	1	30
CTAB	1A – 1J	297.5	5	1.98	5	1.26	4	5	14.54	5	610 (atypical peak)	4	75.14	4	94.1329	4	> 480	1	77.167	3.80508	2	39
Zymo Quick-DNA Fungal/Bacterial Miniprep kit*	4A – 4J	Undetected	1	Undetected	1	Undetected	1	5	6.83	4	583 (one sample not detected)	4	77.695	4	108.674	4	> 480	1	104.013	5.12887	1	26
FluoroLyse	7A – 7J	70.3	4	1.58	4	2.42	4	0	Not performed	Not performed	Not performed	Not performed	Not performed	Not performed	Not performed	Not performed	60	5	21.875	1.07865	4	21
GenoLyse	8A – 8J	140.5	5	1.16	3	0.5	3	0	Not performed	Not performed	Not performed	Not performed	Not performed	Not performed	Not performed	Not performed	60	5	18.5361	0.914011	5	21
Xpert buffer/Precipitation	11A – 11J	222.5	5	1.6	4	0.76	3	1	Undetected	Undetected	Undetected	Undetected	Not sequenced	Not sequenced	Not sequenced	Not sequenced	150	5	Not available	Not available	4	22
Zymo Clean and Concentrate kit*	3A – 3J	47.75	3	3	2	0.63	3	5	2.11	3	628 (one sample not detected)	4	80.1	5	113.793	5	> 480	1	101.922	5.02574	1	32
Xpert buffer/CTAB purification	9A – 9J	7.15	2	2.18	3	0.81	3	1	Undetected	Undetected	Undetected	Undetected	Not sequenced	Not sequenced	Not sequenced	Not sequenced	90	1	Not available	Not available	0	10
* Calculations for criteria 5, 6, 7, and 8 were conducted using duplicate data points when the third sample was either not detected, resulting in its exclusion from sequencing, or when the library concentration was approximately 0.2 ng/uL, also leading to exclusion from sequencing.
