# Supplementary material for: Evaluation of DNA extraction methods for clinical Mycobacterium tuberculosis primary liquid culture for whole-genome sequencing
Source: Research Square preprint supplement (doi:10.21203/rs.3.rs-7905849/v1), 2025-11-18
Supplement: Supplementary file 7 [file cpc_kits_suppl_table_4.xlsx]

## Sheet: Supplementary Table 4
Supplementary Table 4. DNA Extraction methods analysis based on the turnaround time and costs.
DNA extraction Method	Sample ID (10x replication)	Turnaround time for 10 samples	Cost (ZAR) per kit	Number of sample per kit	Cost (ZAR) per 10 samples	Cost (ZAR) per sample	Cost (EUR) per sample b
Cetyltrimethyl ammonium bromide (CTAB)
Reduced volume	1A-1J	> 8h	-	10	771.67	77.167	3.76645
Reduced volume + RNase	2A-2J	> 8h	-	10	834.37	83.437	4.07248
FluoroLyse (Hain Lifescience, Nehren, Germany)
Manufacturer's instruction	7A-7J	1 h	2100	96	218.75	21.875	1.0677
Manufacturer's instruction + Precipitation	7A-7J	2h	-	-	350.55	35.055	1.711
GenoLyse (Hain Lifescience, Nehren, Germany)
Manufacturer's instruction	8A-8J	1 h	1779.47	96	185.361	18.5361	0.904732
Manufacturer's instruction + Precipitation	8A-8J	2h	1911.27	-	317.161	31.7161	1.54804
InstaGene Matrix (Bio-rad laboratories, Hercules, USA)
Manufacturer's instruction	5A-5J	1h 20min	1946.86	130	149.758	14.9758	0.730957
Manufacturer's instruction + HR	6A-6J	1h 30min	1948.03	-	150.958	15.0958	0.736814
PrepGEM Bacteria kit (MicroGem, Southampton, United Kingdom)
Manufacturer's instruction	12A-12J	1h 45 min	5957.7	50	1191.54	119.154	5.81579
Manufacturer's instruction + Precipitation	10A-10J	2h 45min	6089.5		1323.34	132.334	6.4591
Xpert buffer (Cepheid, Sunnyval, USA) a
Manufacturer's instruction + CTAB purification	9A-9J	1h 30 min	-	-	-	-	-
Manufacturer's instruction + Precipitation	11A-11J	2h 30min	-	-	-	-	-
MN NucleoSpin Tissue kit (Macherey-Nagel, Düren, Germany)
NucleoSpin® Tissue + modification	13A-13B	3h 40min	3580.8	50	716.16	71.616	3.49551
MN NucleoMag Pathogen	14A-a4-J	2h 40min	7946.6	96	827.771	82.7771	4.04027
Zymo kit (Zymo Research, Irvine, USA)
DNA Clean & Concentrate	3A-3J	1h 20 min	5096.1	50	1019.22	101.922	4.97472
Quick-DNA Fungal/Bacterial	4A-4J	1h 40 min	5200.67	50	1040.13	104.013	5.0768
a: Xpert Buffer is not commercialized independently of the cartridge component.
b: Considering 1 EUR = 20.488 ZAR (23 June 2023).
