# Supplementary material for: Evaluation of DNA extraction methods for clinical Mycobacterium tuberculosis primary liquid culture for whole-genome sequencing
Source: Research Square preprint supplement (doi:10.21203/rs.3.rs-7905849/v1), 2025-11-18
Supplement: Supplementary file 8 [file cpc_kits_suppl_table_5.xlsx]

## Sheet: Supplementary Table 4
Supplementary Table 5. InstaGene Matrix DNA extraction quality control results on clinical primary liquid (MGIT) samples considering 5 replicates for only vorterxing and for utilising a high-seep homogenizer (FastPrep)
Sample ID	Method	Qubit_HS_dsDNA	NanoDrop Nucleic_Acid	NanoDrop Ratio_260/280	NanoDrop Ratio_260/230	DIN
1_No purif	Treatm DNAse buffer + IGM/VTX+1	0.58	21.9	2.39	0.63	Not performed
2_No purif	Treatm DNAse buffer + IGM/VTX+1	1.17	30.2	2.19	0.69	Not performed
3_No purif	Treatm DNAse buffer + IGM/VTX+1	0.551	24	2.25	0.62	Not performed
4_No purif	Treatm DNAse buffer + IGM/VTX+1	0.844	29.3	2.24	0.67	Not performed
5_No purif	Treatm DNAse buffer + IGM/VTX+1	0.846	29.7	2.26	0.64	Not performed
6_No purif	Treatm DNAse buffer + IGM/FastPrep	6.23	24.3	1.87	0.82	Not performed
7_No purif	Treatm DNAse buffer + IGM/FastPrep	4.86	17.6	1.85	0.78	Not performed
8_No purif	Treatm DNAse buffer + IGM/FastPrep	4.96	20.7	1.85	0.84	Not performed
9_No purif	Treatm DNAse buffer + IGM/FastPrep	4.76	21	1.71	0.82	Not performed
10_No purif	Treatm DNAse buffer + IGM/FastPrep	4.51	21.8	1.82	0.89	Not performed
1_Purif	Treatm DNAse buffer + IGM/VTX+1 + Bead Purification	0.59	8.7	1.71	0.55	Undetected
2_Purif	Treatm DNAse buffer + IGM/VTX+1 + Bead Purification	1.51	18.3	1.83	0.95	5.9
3_Purif	Treatm DNAse buffer + IGM/VTX+1 + Bead Purification	0.727	9.9	1.71	0.76	2.4
4_Purif	Treatm DNAse buffer + IGM/VTX+1 + Bead Purification	1.21	15.2	1.76	0.95	5.8
5_Purif	Treatm DNAse buffer + IGM/VTX+1 + Bead Purification	1.15	13.9	1.88	0.96	4.9
6_Purif	Treatm DNAse buffer + IGM/FastPrep + Bead Purification	8.83	26.3	1.87	1.11	6.4
7_Purif	Treatm DNAse buffer + IGM/FastPrep + Bead Purification	5.82	18.4	1.87	0.95	6.4
8_Purif	Treatm DNAse buffer + IGM/FastPrep + Bead Purification	6.44	20.4	1.84	0.97	6.4
9_Purif	Treatm DNAse buffer + IGM/FastPrep + Bead Purification	6.16	19.4	1.85	0.98	6.4
10_Purif	Treatm DNAse buffer + IGM/FastPrep + Bead Purification	7.48	25.7	1.92	1.08	6.4
