# Supplementary figures and images for: Evaluation of DNA extraction methods for clinical Mycobacterium tuberculosis primary liquid culture for whole-genome sequencing
Source: Research Square preprint supplement (doi:10.21203/rs.3.rs-7905849/v1), 2025-11-18

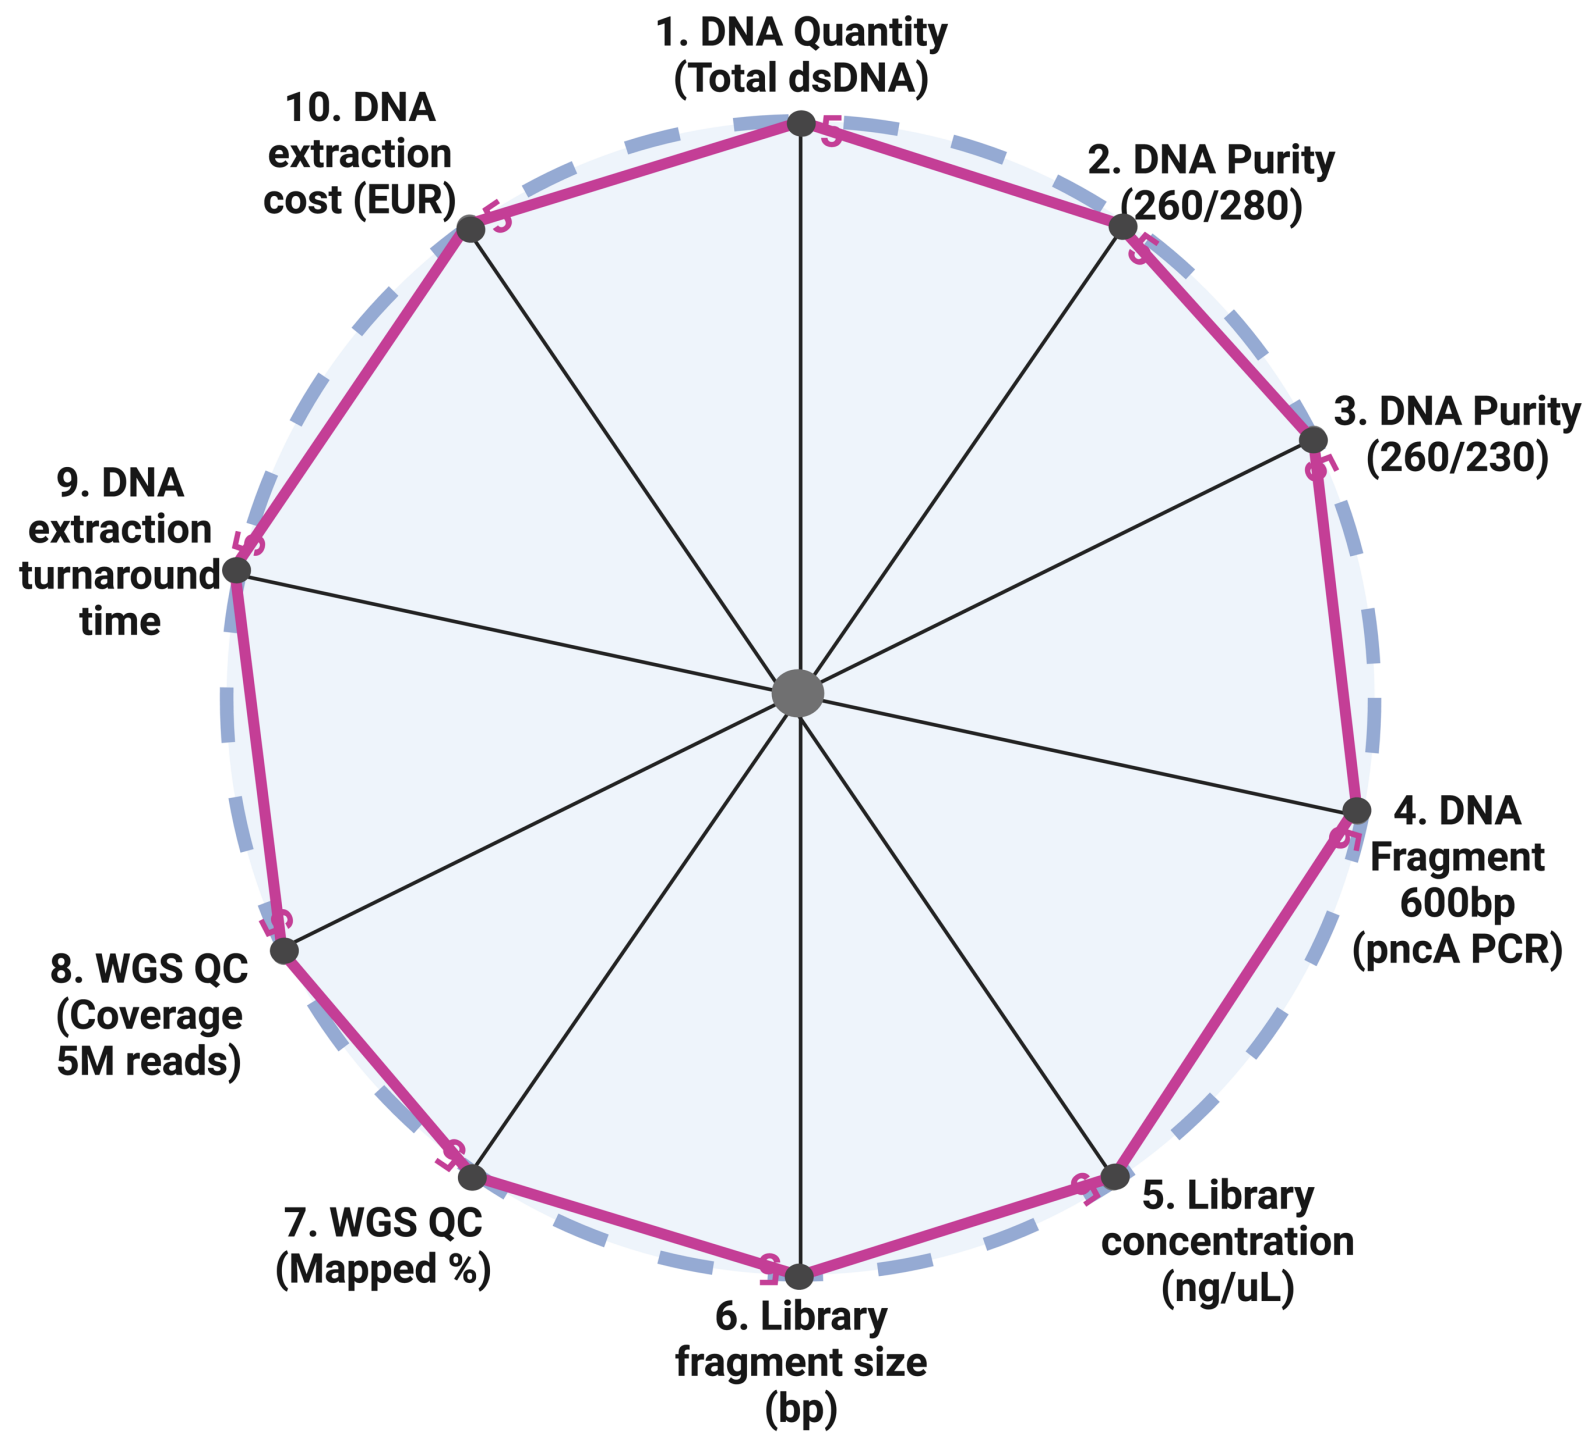

Supplement: Supplementary file 2 [file cpc_kits_suppl_fig_2.pdf › cpc_kits_suppl_material/cpc_kits_suppl_figures/cpc_kits_suppl_figs_v4/cpc_kits_suppl_fig_2.pdf]
